# Supplementary material
Source: HighWire-hosted journal article supplement (https://jnm.snmjournals.org/highwire/filestream/95330/field_highwire_adjunct_files/0/208827_Supplemental_Data.pdf)
Supplement: 208827_Supplemental_Data.pdf [file 208827_Supplemental_Data.pdf]

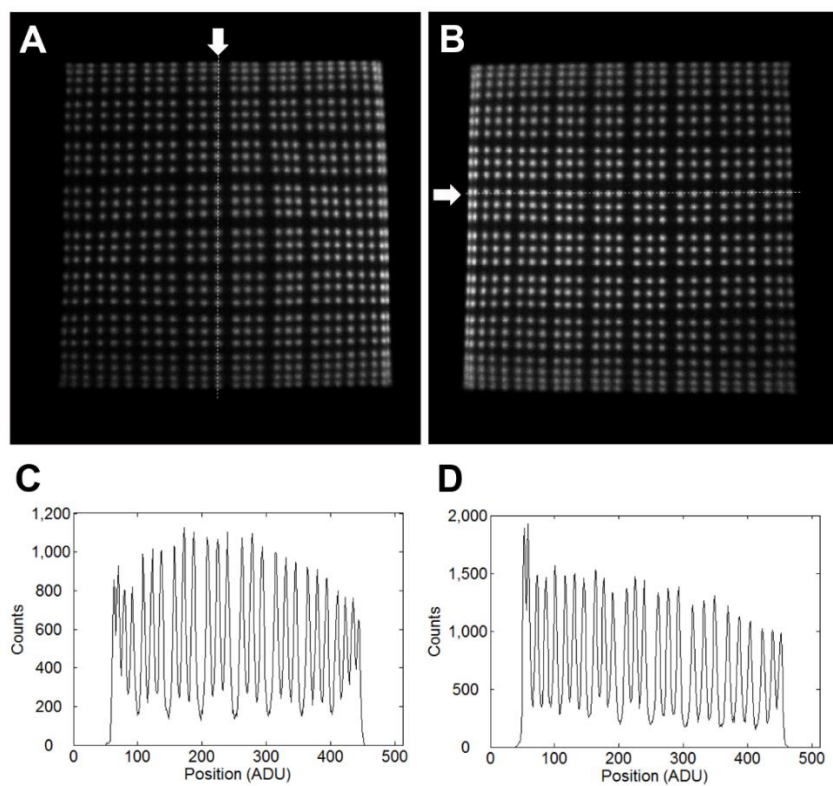

**SUPPLEMENTAL FIGURE 1.** (A) and (B): flood images acquired from two detector modules in one of the four detector panels; (C) a vertical profile across one column of crystals; (D) a horizontal profile across one row of crystals.
